# Supplementary material for: Precipitation shapes communities of arbuscular mycorrhizal fungi in Tibetan alpine steppe
Source: PubMed Central journal article supplement (PMC4802204; doi:10.1038/srep23488), 2016-03-22
Supplement: srep23488-s1.pdf [file srep23488-s1.pdf]

## Supplementary Information

Precipitation shapes communities of arbuscular mycorrhizal fungi in Tibetan alpine steppe

Jing Zhang <sup>1</sup>, Fang Wang <sup>1</sup>, Rongxiao Che <sup>1</sup>, Ping Wang <sup>2</sup>, Hanke Liu <sup>1</sup>, Baoming Ji <sup>2\*</sup>

Xiaoyong Cui <sup>1\*</sup>

<sup>1</sup> College of Life Sciences, University of Chinese Academy of Sciences, No. 19A, Yuquan Road, Shijingshan District, Beijing, 100049, China

<sup>2</sup> College of Forestry, Beijing Forestry University, No.35, Tsinghua East Road, Haidian District, Beijing, 100083, China

\*Corresponding authors: Baoming Ji, Xiaoyong Cui

Tel: +86-10-88256497; Fax: +86-10-88256497

E-mail: baomingji@bjfu.edu.cn, cuixy@ucas.ac.cn

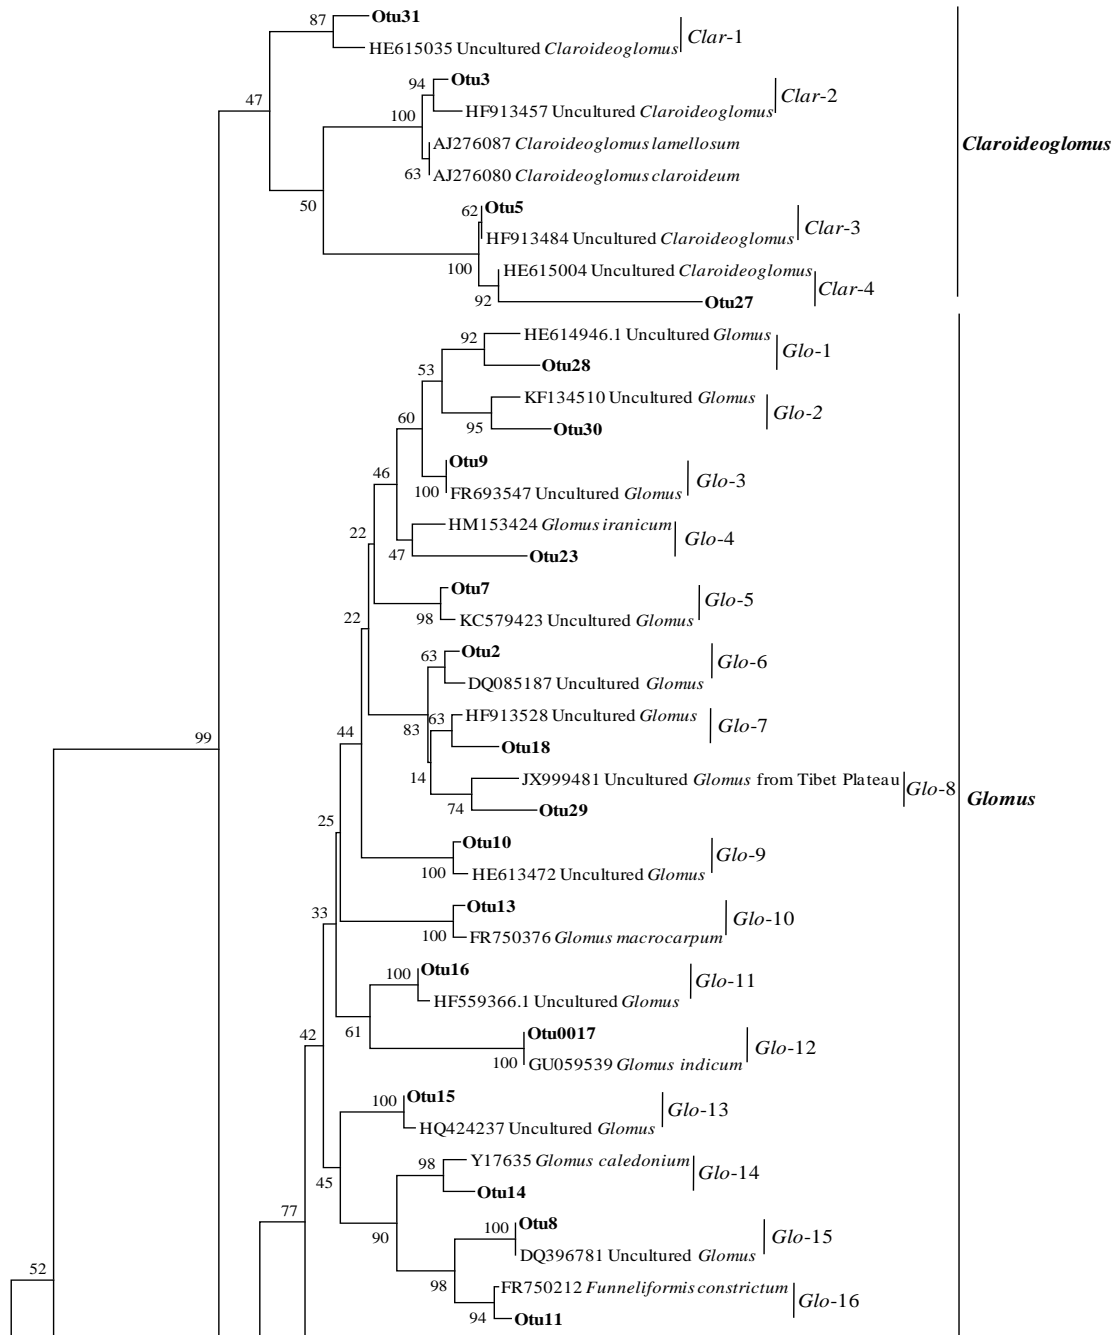

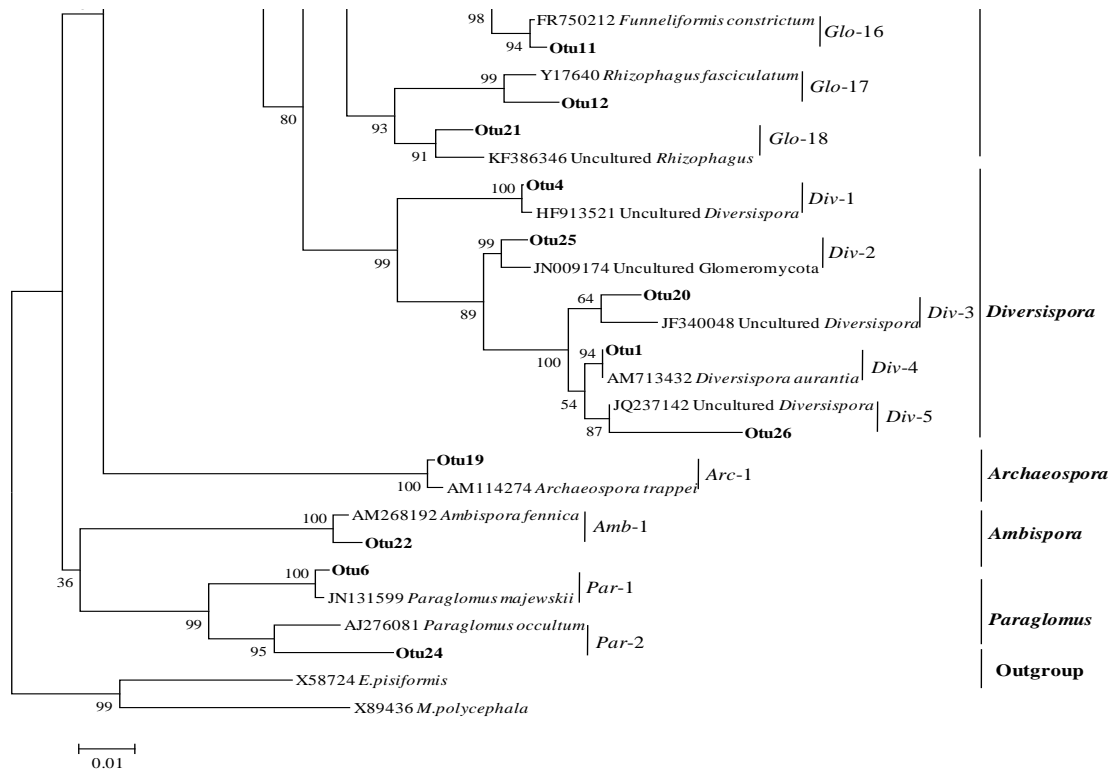

**Figure S1.** Neighbor joining phylogenetic tree of the Glomeromycota based on partial SSU rDNA sequences showing the phylogenetic relationship of the OTUs obtained from this study. Numbers above the branches denote bootstrap values from 1000 replications (values > 60% are shown).

**Figure S2.** Relative abundance (% , percentage of clones) of AMF genera of rhizosphere soil in each site.

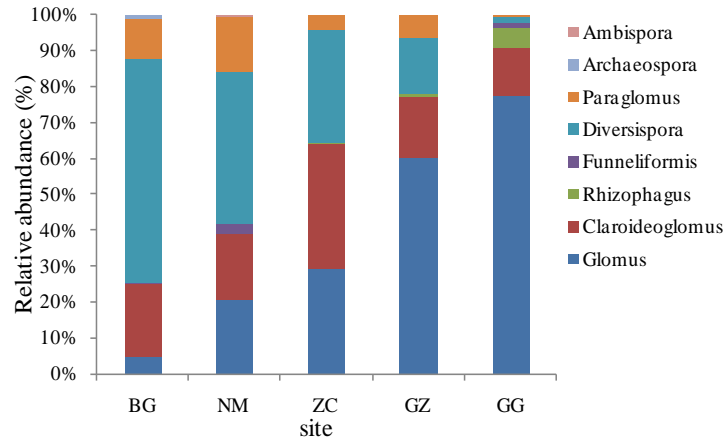

**Table S1.** Number of clones for each AMF OTU detected in all combinations of plant

species and sampling sites and each OUT's most closely related molecular virtual taxon

recorded in the MaarjAM database (<http://maarjam.botany.ut.ee/>)

| OTU            | <i>S. purpurea</i> |     |     |     | <i>L. nanum</i> |     |     |     | <i>P. bifurca</i> |     |     |     | Molecular virtual taxon |          |          |
|----------------|--------------------|-----|-----|-----|-----------------|-----|-----|-----|-------------------|-----|-----|-----|-------------------------|----------|----------|
|                | BG                 | NM  | ZC  | GZ  | GG              | BG  | NM  | ZC  | GG                | BG  | NM  | ZC  | GZ                      | MaarjAM  | Identity |
| <i>Glo-1</i>   | 0                  | 0   | 0   | 0   | 0               | 0   | 0   | 0   | 0                 | 0   | 1   | 0   | 0                       | VTX00342 | 98%      |
| <i>Glo-2</i>   | 0                  | 0   | 0   | 0   | 1               | 0   | 0   | 0   | 0                 | 0   | 0   | 0   | 0                       | VTX00166 | 97%      |
| <i>Glo-3</i>   | 0                  | 3   | 6   | 0   | 10              | 0   | 0   | 0   | 4                 | 2   | 2   | 3   | 4                       | VTX00342 | 99%      |
| <i>Glo-4</i>   | 0                  | 0   | 1   | 0   | 0               | 0   | 0   | 0   | 0                 | 0   | 0   | 0   | 1                       | VTX00155 | 96%      |
| <i>Glo-5</i>   | 0                  | 21  | 0   | 32  | 15              | 0   | 0   | 0   | 29                | 25  | 9   | 0   | 0                       | VTX00304 | 99%      |
| <i>Glo-6</i>   | 1                  | 21  | 57  | 45  | 105             | 11  | 15  | 43  | 28                | 4   | 11  | 53  | 49                      | VTX00143 | 99%      |
| <i>Glo-7</i>   | 0                  | 0   | 2   | 1   | 2               | 0   | 0   | 0   | 1                 | 0   | 0   | 0   | 0                       | VTX00143 | 98%      |
| <i>Glo-8</i>   | 0                  | 0   | 0   | 0   | 1               | 0   | 0   | 1   | 0                 | 0   | 0   | 0   | 0                       | VTX00143 | 97%      |
| <i>Glo-9</i>   | 0                  | 0   | 0   | 0   | 7               | 0   | 0   | 0   | 16                | 0   | 0   | 0   | 0                       | VTX00174 | 99%      |
| <i>Glo-10</i>  | 0                  | 0   | 0   | 10  | 2               | 0   | 0   | 0   | 0                 | 1   | 0   | 0   | 2                       | VTX00199 | 99%      |
| <i>Glo-11</i>  | 0                  | 0   | 0   | 0   | 0               | 3   | 0   | 0   | 0                 | 1   | 0   | 0   | 7                       | VTX00130 | 99%      |
| <i>Glo-12</i>  | 0                  | 0   | 0   | 6   | 0               | 0   | 0   | 0   | 0                 | 0   | 0   | 0   | 1                       | VTX00222 | 100%     |
| <i>Glo-13</i>  | 0                  | 4   | 0   | 4   | 1               | 0   | 0   | 0   | 4                 | 0   | 0   | 0   | 0                       | VTX00301 | 99%      |
| <i>Glo-14</i>  | 0                  | 0   | 0   | 13  | 0               | 0   | 0   | 0   | 0                 | 0   | 0   | 0   | 0                       | VTX00067 | 100%     |
| <i>Glo-15</i>  | 0                  | 1   | 0   | 36  | 0               | 0   | 0   | 0   | 0                 | 0   | 26  | 0   | 24                      | VTX00293 | 100%     |
| <i>Glo-16</i>  | 0                  | 0   | 0   | 0   | 4               | 0   | 15  | 0   | 0                 | 2   | 0   | 0   | 0                       | VTX00064 | 99%      |
| <i>Glo-17</i>  | 0                  | 0   | 0   | 0   | 16              | 0   | 0   | 3   | 0                 | 0   | 0   | 0   | 0                       | VTX00105 | 99%      |
| <i>Glo-18</i>  | 0                  | 0   | 0   | 4   | 0               | 0   | 0   | 0   | 0                 | 0   | 0   | 0   | 0                       | VTX00214 | 98%      |
| <i>Clar-1</i>  | 0                  | 0   | 0   | 0   | 1               | 0   | 0   | 0   | 0                 | 0   | 0   | 0   | 0                       | VTX00193 | 98%      |
| <i>Clar-2</i>  | 2                  | 9   | 16  | 29  | 27              | 4   | 3   | 37  | 11                | 12  | 20  | 47  | 45                      | VTX00193 | 99%      |
| <i>Clar-3</i>  | 16                 | 11  | 28  | 0   | 0               | 29  | 46  | 55  | 0                 | 27  | 10  | 14  | 0                       | VTX00056 | 99%      |
| <i>Clar-4</i>  | 0                  | 0   | 0   | 0   | 0               | 0   | 1   | 0   | 0                 | 0   | 0   | 0   | 0                       | VTX00056 | 96%      |
| <i>Div-1</i>   | 32                 | 42  | 3   | 1   | 0               | 11  | 24  | 15  | 0                 | 20  | 33  | 6   | 49                      | VTX00354 | 99%      |
| <i>Div-2</i>   | 0                  | 0   | 0   | 0   | 0               | 0   | 0   | 0   | 0                 | 0   | 0   | 0   | 2                       | VTX00380 | 98%      |
| <i>Div-3</i>   | 0                  | 2   | 0   | 0   | 0               | 2   | 0   | 0   | 0                 | 0   | 0   | 0   | 0                       | VTX00062 | 97%      |
| <i>Div-4</i>   | 93                 | 48  | 42  | 0   | 6               | 55  | 17  | 34  | 0                 | 66  | 67  | 75  | 17                      | VTX00054 | 100%     |
| <i>Div-5</i>   | 0                  | 0   | 1   | 0   | 0               | 0   | 0   | 0   | 0                 | 0   | 0   | 0   | 0                       | VTX00062 | 97%      |
| <i>Par-1</i>   | 12                 | 42  | 14  | 26  | 1               | 16  | 11  | 3   | 0                 | 21  | 31  | 7   | 1                       | VTX00335 | 100%     |
| <i>Par-2</i>   | 0                  | 0   | 0   | 0   | 0               | 2   | 0   | 0   | 0                 | 0   | 0   | 0   | 0                       | VTX00350 | 98%      |
| <i>Arc-1</i>   | 3                  | 0   | 0   | 0   | 0               | 0   | 0   | 0   | 0                 | 1   | 0   | 0   | 0                       | VTX00245 | 99%      |
| <i>Amb-1</i>   | 0                  | 2   | 0   | 0   | 0               | 0   | 0   | 0   | 0                 | 0   | 2   | 0   | 0                       | VTX00283 | 99%      |
| Total clones   | 159                | 206 | 170 | 207 | 199             | 182 | 210 | 205 | 202               | 133 | 134 | 191 | 93                      |          |          |
| Total richness | 7                  | 12  | 10  | 12  | 15              | 12  | 10  | 7   | 12                | 9   | 9   | 8   | 7                       |          |          |

**Table S2.** Statistical results of the Multiple Response Permutation Procedure (MRPP)

testing the pairwise differences in AMF communities between sites.

| Site pairs | Delta | <i>P</i> |
|------------|-------|----------|
| BG / NM    | 0.52  | 0.011    |
| BG / ZC    | 0.45  | 0.001    |
| BG / GZ    | 0.56  | 0.001    |
| BG / GG    | 0.51  | 0.001    |
| NM / ZC    | 0.50  | 0.001    |
| NM / GZ    | 0.63  | 0.001    |
| NM / GG    | 0.58  | 0.001    |
| ZC / GZ    | 0.54  | 0.001    |
| ZC / GG    | 0.49  | 0.001    |
| GZ / GG    | 0.66  | 0.029    |

**Table S3.** Statistical results of the Multiple Response Permutation Procedure (MRPP) and the analysis of molecular variance (AMOVA) testing the pairwise differences in AMF communities between host plants within a site.

| Site | Plant pairs                            | MRPP  |          | AMOVA |          |
|------|----------------------------------------|-------|----------|-------|----------|
|      |                                        | Delta | <i>P</i> | F     | <i>P</i> |
| BG   | <i>S. purpurea</i> / <i>L. nanum</i>   | 0.47  | 0.38     | 1.14  | 0.31     |
|      | <i>S. purpurea</i> / <i>P. bifurca</i> | 0.47  | 0.66     | 1.00  | 0.45     |
|      | <i>L. nanum</i> / <i>P. bifurca</i>    | 0.48  | 0.92     | 0.40  | 0.68     |
| NM   | <i>S. purpurea</i> / <i>L. nanum</i>   | 0.55  | 0.05     | 1.59  | 0.24     |
|      | <i>S. purpurea</i> / <i>P. bifurca</i> | 0.50  | 0.37     | 0.15  | 0.99     |
|      | <i>L. nanum</i> / <i>P. bifurca</i>    | 0.57  | 0.06     | 1.56  | 0.23     |
| ZC   | <i>S. purpurea</i> / <i>L. nanum</i>   | 0.39  | 0.19     | 2.10  | 0.16     |
|      | <i>S. purpurea</i> / <i>P. bifurca</i> | 0.43  | 0.34     | 0.70  | 0.44     |
| GG   | <i>L. nanum</i> / <i>P. bifurca</i>    | 0.40  | 0.06     | 1.99  | 0.16     |
|      | <i>S. purpurea</i> / <i>P. bifurca</i> | 0.72  | 0.43     | 1.98  | 0.17     |
| GG   | <i>S. purpurea</i> / <i>L. nanum</i>   | 0.59  | 0.42     | 0.56  | 1        |

**Table S4.** Physical and chemical characteristics (mean  $\pm$  SE) of rhizosphere soils collected from different host-site combinations. Data with different lowercase letters and “\*” indicate significant levels at  $P < 0.05$ . “-” indicates no significance. “/” means no data available.

|                           | SOM (g/kg)        | N (g/kg)         | P (mg/kg)        | pH                | clay (%)           | silt (%)          | sand (%)          |
|---------------------------|-------------------|------------------|------------------|-------------------|--------------------|-------------------|-------------------|
| <b><i>S. purpurea</i></b> |                   |                  |                  |                   |                    |                   |                   |
| BG                        | 17.9 $\pm$ 1.18b  | 1.21 $\pm$ 0.05b | 4.74 $\pm$ 0.31a | 8.48 $\pm$ 0.03a  | 17.55 $\pm$ 0.52b  | 41.72 $\pm$ 2.25b | 40.73 $\pm$ 2.73a |
| NM                        | 22.15 $\pm$ 1.2b  | 1.28 $\pm$ 0.26b | 6.04 $\pm$ 0.61a | 8.9 $\pm$ 0.17b   | 19.03 $\pm$ 0.47b  | 45.17 $\pm$ 2.23b | 35.8 $\pm$ 2.62a  |
| ZC                        | 19.06 $\pm$ 2.1b  | 1.33 $\pm$ 0.3b  | 5.04 $\pm$ 0.17a | 8.52 $\pm$ 0.04a  | 15.81 $\pm$ 0.71ab | 47.1 $\pm$ 1.62b  | 37.1 $\pm$ 2.1a   |
| GZ                        | 4.69 $\pm$ 1.22a  | 0.38 $\pm$ 0.08a | 6.35 $\pm$ 0.74a | 9.22 $\pm$ 0.1c   | 12.34 $\pm$ 1.89a  | 27.13 $\pm$ 5.33a | 60.53 $\pm$ 7.17b |
| GG                        | 8.45 $\pm$ 1.44a  | 0.59 $\pm$ 0.12a | 5.06 $\pm$ 0.42a | 8.61 $\pm$ 0.11ab | 15.31 $\pm$ 2.01ab | 29.49 $\pm$ 3.25a | 55.2 $\pm$ 4.98b  |
| <b><i>L. nanum</i></b>    |                   |                  |                  |                   |                    |                   |                   |
| BG                        | 17.23 $\pm$ 1.01b | 1.22 $\pm$ 0.04b | 4.36 $\pm$ 0.63a | 8.59 $\pm$ 0.03a  | 16.19 $\pm$ 0.3a   | 44.3 $\pm$ 1.82a  | 39.5 $\pm$ 2.1a   |
| NM                        | 17.48 $\pm$ 0.85b | 1.18 $\pm$ 0.03b | 5.67 $\pm$ 0.43a | 8.56 $\pm$ 0.03a  | 15.01 $\pm$ 0.48a  | 38.03 $\pm$ 1.14a | 46.96 $\pm$ 1.53a |
| ZC                        | 17.98 $\pm$ 1.46b | 1.19 $\pm$ 0.11b | 4.6 $\pm$ 0.36a  | 8.6 $\pm$ 0.02a   | 14.01 $\pm$ 1.35a  | 42.56 $\pm$ 2.87a | 43.43 $\pm$ 4.09a |
| GG                        | 6.72 $\pm$ 1.36a  | 0.78 $\pm$ 0.19a | 5.29 $\pm$ 0.51a | 9.72 $\pm$ 0.08b  | 21.38 $\pm$ 0.65b  | 42.14 $\pm$ 3.34a | 36.48 $\pm$ 3.97a |
| <b><i>P. bifurca</i></b>  |                   |                  |                  |                   |                    |                   |                   |
| BG                        | 13.97 $\pm$ 3.11b | 1.16 $\pm$ 0.08a | 4.99 $\pm$ 0.24a | 8.59 $\pm$ 0.02ab | 17.12 $\pm$ 0.72b  | 43.43 $\pm$ 2.51b | 39.45 $\pm$ 3.2a  |
| NM                        | 21.68 $\pm$ 0.99c | 1.41 $\pm$ 0.29a | 4.41 $\pm$ 0.55a | 8.68 $\pm$ 0.05b  | 18.8 $\pm$ 0.42b   | 48.25 $\pm$ 1.95b | 32.94 $\pm$ 2.01a |
| ZC                        | 20.02 $\pm$ 0.56c | 1.32 $\pm$ 0.04a | 4.32 $\pm$ 0.33a | 8.54 $\pm$ 0.03a  | 17.69 $\pm$ 2.24b  | 46.4 $\pm$ 3.14b  | 35.9 $\pm$ 5.3a   |
| GZ                        | 2.78 $\pm$ 0.26a  | 1.02 $\pm$ 0.32a | 4.66 $\pm$ 0.41a | 9.08 $\pm$ 0.05c  | 7.56 $\pm$ 2.57a   | 14.1 $\pm$ 5.74a  | 78.34 $\pm$ 8.3b  |
| site                      | *                 | *                | -                | *                 | *                  | *                 | *                 |
| plant species             | -                 | -                | *                | -                 | -                  | -                 | -                 |



**Table S5.** Statistical results of Mantel test and partial Mantel test examining the correlations between AMF community composition and precipitation, soil variables, plant biomass and coverage.

|               | mantel   |          | partial mantel |          |
|---------------|----------|----------|----------------|----------|
|               | <i>r</i> | <i>P</i> | <i>r</i>       | <i>P</i> |
| precipitation | 0.54     | 0.001    | 0.459          | 0.001    |
| coverage      | 0.57     | 0.00     | 0.251          | 0.001    |
| SOM           | 0.38     | 0.001    | 0.071          | 0.095    |
| pH            | 0.36     | 0.001    | 0.152          | 0.007    |
| N             | 0.27     | 0.001    | 0.144          | 0.009    |
| silt          | 0.17     | 0.01     | -0.064         | 0.797    |
| sand          | 0.16     | 0.013    | -0.064         | 0.851    |
| clay          | 0.14     | 0.04     | -0.008         | 0.881    |
| biomass       | 0.02     | 0.249    |                |          |
| P             | 0.02     | 0.335    |                |          |

**Table S6.** Coefficients and *P* values of correlation analyses and partial correlation analyses testing the relationships between either AMF species richness (top) or hyphal length density (bottom) with precipitation, soil variables, plant biomass and coverage.

|                       | Explanatory factor | Correlation analysis |          | Partial correlation analysis |          |
|-----------------------|--------------------|----------------------|----------|------------------------------|----------|
|                       |                    | <i>r</i>             | <i>P</i> | <i>r</i>                     | <i>P</i> |
| AMF species richness  | SOM                | 0.565                | 0.000    | 0.318                        | 0.021    |
|                       | coverage           | 0.5                  | 0.000    | -0.013                       | 0.927    |
|                       | precipitation      | 0.411                | 0.001    | 0.085                        | 0.547    |
|                       | pH                 | -0.401               | 0.001    | -0.153                       | 0.278    |
|                       | silt               | 0.309                | 0.016    | -0.045                       | 0.751    |
|                       | N                  | 0.301                | 0.018    | -0.046                       | 0.746    |
|                       | sand               | -0.274               | 0.033    | -0.045                       | 0.751    |
|                       | P                  | -0.219               | 0.89     | /                            | /        |
|                       | clay               | 0.148                | 0.254    | /                            | /        |
|                       | biomass            | 0.13                 | 0.316    | /                            | /        |
| Hyphal length density | precipitation      | 0.622                | 0.000    | 0.332                        | 0.016    |
|                       | coverage           | 0.505                | 0.000    | 0.019                        | 0.892    |
|                       | SOM                | 0.332                | 0.009    | -0.026                       | 0.853    |
|                       | pH                 | -0.257               | 0.046    | -0.187                       | 0.185    |
|                       | N                  | 0.229                | 0.076    | /                            | /        |
|                       | biomass            | 0.194                | 0.134    | /                            | /        |
|                       | silt               | 0.184                | 0.155    | /                            | /        |
|                       | sand               | -0.177               | 0.173    | /                            | /        |
|                       | clay               | 0.136                | 0.298    | /                            | /        |
|                       | P                  | 0.066                | 0.615    | /                            | /        |
